# Supplementary material for: Probabilistic graphical model for the evaluation of the emotional and dramatic personality disorders
Source: Frontiers journal article supplement (doi:10.3389/fpsyg.2022.996609), 2022-11-25
Supplement: Data_Sheet_1.PDF [file Data_Sheet_1.PDF]

## *Supplementary Material*

### **1 Supplementary Data**

We provide a map of variables for the Bayesian network to allow for a better understanding of the model. We have based it on figures 1 and 2 of the manuscript to include all the nodes of the model dividing them into three tables.

The nodes described in Table 1 correspond to the first level of the BN2O model pertaining to the personality disorders; they are drawn in yellow in figure 2. These nodes are "variables of interest", i.e., they are nodes for which we want to find out the probability that they are in one state or another.

These variables do not have ancestor nodes, so we use the prevalence of these disorders in the clinical population to determine the prior probabilities.

The nodes in Table 2 correspond to the psychological features that a person may exhibit that help us determine whether a personality disorder is present. Regarding figure 1 of the manuscript, these nodes would be at the lower level of the BN2O model and are drawn in blue in figure 2.

The symptoms' ancestor nodes are the variables representing the personality disorders described in Table 1. The successor nodes are the variables representing the psychological distress we shall see below in Table 3.

The nodes presented in Table 3 represent the psychological distress that a person may experience when a given combination of symptoms are present. Therefore, the ancestor nodes are those symptoms capable of generating psychological distress. These variables have no successor nodes.

These nodes correspond to the augmented level of the BN2O model in figure 1 and are drawn in red in figure 2.

## 2 Supplementary Tables

**Table 1**

*First level of the BN2O model – personality disorders.*

| Variable              | Description                             | States         | Ancestor nodes |
|-----------------------|-----------------------------------------|----------------|----------------|
| Antisocial PD         | Antisocial personality disorder         | present/absent | --             |
| Borderline PD         | Borderline personality disorder         | present/absent | --             |
| Narcissistic PD       | Narcissistic personality disorder       | present/absent | --             |
| Histrionic PD         | Histrionic personality disorder         | present/absent | --             |
| Passive aggressive PD | Passive aggressive personality disorder | present/absent | --             |

**Table 2**

*Second level of the BN2O model – Symptoms.*

| Variable   | Description                                                                         | States                 | Ancestor nodes                   |
|------------|-------------------------------------------------------------------------------------|------------------------|----------------------------------|
| DSM-ATS-01 | 1 <sup>st</sup> symptom of antisocial personality disorder as described in the DSM. | present/ <u>absent</u> | Antisocial PD                    |
| DSM-ATS-02 | 2 <sup>nd</sup> symptom of antisocial personality disorder as described in the DSM. | present/ <u>absent</u> | Antisocial PD                    |
| DSM-ATS-03 | 3 <sup>rd</sup> symptom of antisocial personality disorder as described in the DSM. | present/ <u>absent</u> | Antisocial PD<br>Borderline PD   |
| DSM-ATS-04 | 4 <sup>th</sup> symptom of antisocial personality disorder as described in the DSM. | present/ <u>absent</u> | Antisocial PD<br>Borderline PD   |
| DSM-ATS-05 | 5 <sup>th</sup> symptom of antisocial personality disorder as described in the DSM. | present/ <u>absent</u> | Antisocial PD<br>Borderline PD   |
| DSM-ATS-06 | 6 <sup>th</sup> symptom of antisocial personality disorder as described in the DSM. | present/ <u>absent</u> | Antisocial PD                    |
| DSM-ATS-07 | 7 <sup>th</sup> symptom of antisocial personality disorder as described in the DSM. | present/ <u>absent</u> | Antisocial PD<br>Narcissistic PD |

| Variable   | Description                                                                           | States                 | Ancestor nodes                   |
|------------|---------------------------------------------------------------------------------------|------------------------|----------------------------------|
| DSM-BDL-01 | 1 <sup>st</sup> symptom of borderline personality disorder as described in the DSM.   | present/ <u>absent</u> | Borderline PD<br>Histrionic PD   |
| DSM-BDL-02 | 2 <sup>nd</sup> symptom of borderline personality disorder as described in the DSM.   | present/ <u>absent</u> | Borderline PD<br>Histrionic PD   |
| DSM-BDL-03 | 3 <sup>rd</sup> symptom of borderline personality disorder as described in the DSM.   | present/ <u>absent</u> | Borderline PD                    |
| DSM-BDL-04 | 4 <sup>th</sup> symptom of borderline personality disorder as described in the DSM.   | present/ <u>absent</u> | Borderline PD                    |
| DSM-BDL-05 | 5 <sup>th</sup> symptom of borderline personality disorder as described in the DSM.   | present/ <u>absent</u> | Borderline PD                    |
| DSM-BDL-06 | 6 <sup>th</sup> symptom of borderline personality disorder as described in the DSM.   | present/ <u>absent</u> | Borderline PD<br>Histrionic PD   |
| DSM-BDL-07 | 7 <sup>th</sup> symptom of borderline personality disorder as described in the DSM.   | present/ <u>absent</u> | Borderline PD                    |
| DSM-BDL-08 | 8 <sup>th</sup> symptom of borderline personality disorder as described in the DSM.   | present/ <u>absent</u> | Borderline PD<br>Antisocial PD   |
| DSM-BDL-09 | 9 <sup>th</sup> symptom of borderline personality disorder as described in the DSM.   | present/ <u>absent</u> | Borderline PD<br>Histrionic PD   |
| DSM-NAR-01 | 1 <sup>st</sup> symptom of narcissistic personality disorder as described in the DSM. | present/ <u>absent</u> | Narcissistic PD                  |
| DSM-NAR-02 | 2 <sup>nd</sup> symptom of narcissistic personality disorder as described in the DSM. | present/ <u>absent</u> | Narcissistic PD                  |
| DSM-NAR-03 | 3 <sup>rd</sup> symptom of narcissistic personality disorder as described in the DSM. | present/ <u>absent</u> | Narcissistic PD                  |
| DSM-NAR-04 | 4 <sup>th</sup> symptom of narcissistic personality disorder as described in the DSM. | present/ <u>absent</u> | Narcissistic PD<br>Histrionic PD |
| DSM-NAR-05 | 5 <sup>th</sup> symptom of narcissistic personality disorder as described in the DSM. | present/ <u>absent</u> | Narcissistic PD                  |

| Variable   | Description                                                                                 | States                 | Ancestor nodes                           |
|------------|---------------------------------------------------------------------------------------------|------------------------|------------------------------------------|
| DSM-NAR-06 | 6 <sup>th</sup> symptom of narcissistic personality disorder as described in the DSM.       | present/ <u>absent</u> | Narcissistic PD                          |
| DSM-NAR-07 | 7 <sup>th</sup> symptom of narcissistic personality disorder as described in the DSM.       | present/ <u>absent</u> | Narcissistic PD<br>Antisocial PD         |
| DSM-NAR-08 | 8 <sup>th</sup> symptom of narcissistic personality disorder as described in the DSM.       | present/ <u>absent</u> | Narcissistic PD<br>Passive aggressive PD |
| DSM-NAR-09 | 9 <sup>th</sup> symptom of narcissistic personality disorder as described in the DSM.       | present/ <u>absent</u> | Narcissistic PD                          |
| DSM-HST-01 | 1 <sup>st</sup> symptom of histrionic personality disorder as described in the DSM.         | present/ <u>absent</u> | Histrionic PD<br>Narcissistic PD         |
| DSM-HST-02 | 2 <sup>nd</sup> symptom of histrionic personality disorder as described in the DSM.         | present/ <u>absent</u> | Histrionic PD                            |
| DSM-HST-03 | 3 <sup>rd</sup> symptom of histrionic personality disorder as described in the DSM.         | present/ <u>absent</u> | Histrionic PD                            |
| DSM-HST-04 | 4 <sup>th</sup> symptom of histrionic personality disorder as described in the DSM.         | present/ <u>absent</u> | Histrionic PD                            |
| DSM-HST-05 | 5 <sup>th</sup> symptom of histrionic personality disorder as described in the DSM.         | present/ <u>absent</u> | Histrionic PD                            |
| DSM-HST-06 | 6 <sup>th</sup> symptom of histrionic personality disorder as described in the DSM.         | present/ <u>absent</u> | Histrionic PD                            |
| DSM-HST-07 | 7 <sup>th</sup> symptom of histrionic personality disorder as described in the DSM.         | present/ <u>absent</u> | Histrionic PD<br>Borderline PD           |
| DSM-HST-08 | 8 <sup>th</sup> symptom of histrionic personality disorder as described in the DSM.         | present/ <u>absent</u> | Histrionic PD<br>Borderline PD           |
| DSM-PAG-01 | 1 <sup>st</sup> symptom of passive-aggressive personality disorder as described in the DSM. | present/ <u>absent</u> | Passive aggressive PD<br>Antisocial PD   |

| Variable                  | Description                                                                                 | States                   | Ancestor nodes                                                             |
|---------------------------|---------------------------------------------------------------------------------------------|--------------------------|----------------------------------------------------------------------------|
| DSM-PAG-02                | 2 <sup>nd</sup> symptom of passive-aggressive personality disorder as described in the DSM. | present/ <u>absent</u>   | Passive aggressive PD<br>Histrionic PD                                     |
| DSM-PAG-03                | 3 <sup>rd</sup> symptom of passive-aggressive personality disorder as described in the DSM. | present/ <u>absent</u>   | Passive aggressive PD<br>Antisocial PD                                     |
| DSM-PAG-04                | 4 <sup>th</sup> symptom of passive-aggressive personality disorder as described in the DSM. | present/ <u>absent</u>   | Passive aggressive PD<br>Antisocial PD                                     |
| DSM-PAG-05                | 5 <sup>th</sup> symptom of passive-aggressive personality disorder as described in the DSM. | present/ <u>absent</u>   | Passive aggressive PD<br>Narcissistic PD                                   |
| DSM-PAG-06                | 6 <sup>th</sup> symptom of passive-aggressive personality disorder as described in the DSM. | present/ <u>absent</u>   | Passive aggressive PD                                                      |
| DSM-PAG-07                | 7 <sup>th</sup> symptom of passive-aggressive personality disorder as described in the DSM. | present/ <u>absent</u>   | Passive aggressive PD                                                      |
| FFM-N1-Anxiety            | Anxiety trait from the FFM neuroticism domain.                                              | high/ <u>medium</u> /low | Antisocial PD<br>Borderline PD                                             |
| FFM-N2-Angry hostility    | Hostility trait from the FFM neuroticism domain.                                            | high/ <u>medium</u> /low | Antisocial PD<br>Borderline PD<br>Narcissistic PD<br>Passive aggressive PD |
| FFM-N3-Depression         | Depression trait from the FFM neuroticism domain.                                           | high/ <u>medium</u> /low | Borderline PD<br>Histrionic PD                                             |
| FFM-N4-Self-consciousness | Self-consciousness trait from the FFM neuroticism domain.                                   | high/ <u>medium</u> /low | Antisocial PD                                                              |
| FFM-N5-Impulsiveness      | Impulsiveness trait from the FFM neuroticism domain.                                        | high/ <u>medium</u> /low | Antisocial PD<br>Borderline PD                                             |
| FFM-N6-Vulnerability      | Vulnerability trait from the FFM neuroticism domain.                                        | high/ <u>medium</u> /low | Borderline PD<br>Histrionic PD                                             |

| Variable                   | Description                                                  | States                   | Ancestor nodes                                                                              |
|----------------------------|--------------------------------------------------------------|--------------------------|---------------------------------------------------------------------------------------------|
| FFM-E1-Warmth              | Warmth trait from the FFM extraversion domain.               | high/ <u>medium</u> /low | Antisocial PD<br>Borderline PD<br>Narcissistic PD                                           |
| FFM-E2-Gregariousness      | Gregariousness trait from the FFM extraversion domain.       | high/ <u>medium</u> /low | Antisocial PD<br>Borderline PD<br>Histrionic PD                                             |
| FFM-E3-Assertiveness       | Assertiveness trait from the FFM extraversion domain.        | high/ <u>medium</u> /low | Narcissistic PD<br>Passive aggressive PD                                                    |
| FFM-E4-Activity            | Activity trait from the FFM extraversion domain.             | high/ <u>medium</u> /low | Histrionic PD                                                                               |
| FFM-E5-Excitement seeking  | Excitement seeking trait from the FFM extraversion domain.   | high/ <u>medium</u> /low | Antisocial PD<br>Narcissistic PD<br>Histrionic PD                                           |
| FFM-E6-Positive emotions   | Positive emotions trait from the FFM extraversion domain.    | high/ <u>medium</u> /low | Histrionic PD                                                                               |
| FFM-O1-Fantasy             | Fantasy trait from the FFM openness domain.                  | high/ <u>medium</u> /low | Borderline PD<br>Narcissistic PD<br>Histrionic PD                                           |
| FFM-O3-Feelings            | Feelings trait from the FFM openness domain.                 | high/ <u>medium</u> /low | Histrionic PD                                                                               |
| FFM-O4-Actions             | Actions trait from the FFM openness domain.                  | high/ <u>medium</u> /low | Borderline PD<br>Histrionic PD                                                              |
| FFM-A1-Trust               | Trust trait from the FFM agreeableness domain.               | high/ <u>medium</u> /low | Antisocial PD<br>Borderline PD<br>Narcissistic PD<br>Histrionic PD<br>Passive aggressive PD |
| FFM-A2-Straightforwardness | Straightforwardness trait from the FFM agreeableness domain. | high/ <u>medium</u> /low | Antisocial PD<br>Borderline PD<br>Narcissistic PD<br>Passive aggressive PD                  |

| Variable                 | Description                                                                                                       | States                   | Ancestor nodes                                                                              |
|--------------------------|-------------------------------------------------------------------------------------------------------------------|--------------------------|---------------------------------------------------------------------------------------------|
| FFM-A3-Altruism          | Altruism trait from the FFM agreeableness domain.                                                                 | high/ <u>medium</u> /low | Antisocial PD<br>Narcissistic PD                                                            |
| FFM-A4-Compliance        | Compliance trait from the FFM agreeableness domain.                                                               | high/ <u>medium</u> /low | Antisocial PD<br>Borderline PD<br>Narcissistic PD<br>Passive aggressive PD                  |
| FFM-A5-Modesty           | Modesty trait from the FFM agreeableness domain.                                                                  | high/ <u>medium</u> /low | Antisocial PD<br>Narcissistic PD                                                            |
| FFM-A6-Tender-mindedness | Tender-mindedness trait from the FFM agreeableness domain.                                                        | high/ <u>medium</u> /low | Antisocial PD<br>Narcissistic PD                                                            |
| FFM-C1-Competence        | Competence trait from the FFM conscientiousness domain.                                                           | high/ <u>medium</u> /low | Borderline PD<br>Narcissistic PD<br>Passive aggressive PD                                   |
| FFM-C2-Order             | Order trait from the FFM conscientiousness domain.                                                                | high/ <u>medium</u> /low | Borderline PD                                                                               |
| FFM-C3-Dutifulness       | Dutifulness trait from the FFM conscientiousness domain.                                                          | high/ <u>medium</u> /low | Antisocial PD<br>Passive aggressive PD                                                      |
| FFM-C5-Self-discipline   | Self-discipline trait from the FFM conscientiousness domain.                                                      | high/ <u>medium</u> /low | Antisocial PD<br>Passive aggressive PD                                                      |
| FFM-C6-Deliberation      | Deliberation trait from the FFM conscientiousness domain.                                                         | high/ <u>medium</u> /low | Antisocial PD<br>Borderline PD<br>Histrionic PD                                             |
| LPF-Identity             | Identity scale from the level of personality functioning as described in the general criteria of the DSM-5.       | high/medium/ <u>low</u>  | Antisocial PD<br>Borderline PD<br>Narcissistic PD<br>Histrionic PD<br>Passive aggressive PD |
| LPF-Self-Direction       | Self-Direction scale from the level of personality functioning as described in the general criteria of the DSM-5. | high/medium/ <u>low</u>  | Antisocial PD<br>Borderline PD<br>Narcissistic PD<br>Histrionic PD<br>Passive aggressive PD |

| Variable                     | Description                                                                                                 | States                  | Ancestor nodes                                                                              |
|------------------------------|-------------------------------------------------------------------------------------------------------------|-------------------------|---------------------------------------------------------------------------------------------|
| LPF-Empathy                  | Empathy scale from the level of personality functioning as described in the general criteria of the DSM-5.  | high/medium/ <u>low</u> | Antisocial PD<br>Borderline PD<br>Narcissistic PD<br>Histrionic PD<br>Passive aggressive PD |
| LPF-Intimacy                 | Intimacy scale from the level of personality functioning as described in the general criteria of the DSM-5. | high/medium/ <u>low</u> | Antisocial PD<br>Borderline PD<br>Narcissistic PD<br>Histrionic PD<br>Passive aggressive PD |
| DM-Acting Out                | Acting out defense mechanism as described in the annex B of the DSM-IV-TR.                                  | present/ <u>absent</u>  | Antisocial PD<br>Borderline PD<br>Histrionic PD                                             |
| DM-Idealization              | Idealization defense mechanism as described in the annex B of the DSM-IV-TR.                                | present/ <u>absent</u>  | Borderline PD                                                                               |
| DM-Projective Identification | Projective identification defense mechanism as described in the annex B of the DSM-IV-TR.                   | present/ <u>absent</u>  | Passive aggressive PD                                                                       |
| DM-Denial                    | Denial defense mechanism as described in the annex B of the DSM-IV-TR.                                      | present/ <u>absent</u>  | Antisocial PD<br>Borderline PD<br>Narcissistic PD<br>Histrionic PD                          |
| DM-Dissociation              | Dissociation defense mechanism as described in the annex B of the DSM-IV-TR.                                | present/ <u>absent</u>  | Antisocial PD<br>Narcissistic PD<br>Histrionic PD                                           |
| DM-Devaluation               | Devaluation defense mechanism as described in the annex B of the DSM-IV-TR.                                 | present/ <u>absent</u>  | Borderline PD<br>Narcissistic PD                                                            |
| DM-Projection                | Projection defense mechanism as described in the annex B of the DSM-IV-TR.                                  | present/ <u>absent</u>  | Antisocial PD<br>Narcissistic PD                                                            |
| DM-Splitting                 | Splitting defense mechanism as described in the annex B of the DSM-IV-TR.                                   | present/ <u>absent</u>  | Borderline PD<br>Histrionic PD                                                              |



| Variable              | Description                                                                        | States                   | Ancestor nodes                                                             |
|-----------------------|------------------------------------------------------------------------------------|--------------------------|----------------------------------------------------------------------------|
| DM-Displacement       | Displacement defense mechanism as described in the annex B of the DSM-IV-TR.       | present/ <u>absent</u>   | Passive aggressive PD                                                      |
| DM-Passive Aggression | Passive aggression defense mechanism as described in the annex B of the DSM-IV-TR. | present/ <u>absent</u>   | Borderline PD<br>Histrionic PD<br>Passive aggressive PD                    |
| BioSoc-Pleasure       | “Pleasure” evolutionary task from Millon’s Biosocial model.                        | high/ <u>medium</u> /low | Borderline PD<br>Narcissistic PD<br>Histrionic PD<br>Passive aggressive PD |
| BioSoc-Pain           | “Pain” evolutionary task from Millon’s Biosocial model.                            | high/ <u>medium</u> /low | Borderline PD<br>Histrionic PD<br>Passive aggressive PD                    |
| BioSoc-Active         | “Active” evolutionary task from Millon’s Biosocial model.                          | high/ <u>medium</u> /low | Narcissistic PD<br>Histrionic PD                                           |
| BioSoc-Passive        | “Passive” evolutionary task from Millon’s Biosocial model.                         | high/ <u>medium</u> /low | Borderline PD<br>Histrionic PD<br>Passive aggressive PD                    |
| BioSoc-Self           | “Self” evolutionary task from Millon’s Biosocial model.                            | high/ <u>medium</u> /low | Antisocial PD<br>Narcissistic PD<br>Histrionic PD                          |
| BioSoc-Others         | “Others” evolutionary task from Millon’s Biosocial model.                          | high/ <u>medium</u> /low | Histrionic PD                                                              |

*Note.* Default state for the variable appears as underlined.

**Table 3***Augmented level of the BN2O model – Psychological distress.*

| Variable               | Description                                                          | States         | Ancestor nodes                                                                                                             |
|------------------------|----------------------------------------------------------------------|----------------|----------------------------------------------------------------------------------------------------------------------------|
| Disordered Personality | Psychological distress caused by a personality disorder.             | present/absent | Antisocial PD<br>Borderline PD<br>Narcissistic PD<br>Histrionic PD<br>Passive aggressive PD                                |
| Antisocial FP          | Psychological distress caused by an antisocial functioning pattern.  | present/absent | DSM-ATS-01<br>DSM-ATS-02<br>DSM-ATS-03<br>DSM-ATS-04<br>DSM-ATS-05<br>DSM-ATS-06<br>DSM-ATS-07                             |
| Borderline FP          | Psychological distress caused by a borderline functioning pattern.   | present/absent | DSM-BDL-01<br>DSM-BDL-02<br>DSM-BDL-03<br>DSM-BDL-04<br>DSM-BDL-05<br>DSM-BDL-06<br>DSM-BDL-07<br>DSM-BDL-08<br>DSM-BDL-09 |
| Narcissistic FP        | Psychological distress caused by a narcissistic functioning pattern. | present/absent | DSM-NAR-01<br>DSM-NAR-02<br>DSM-NAR-03<br>DSM-NAR-04<br>DSM-NAR-05<br>DSM-NAR-06<br>DSM-NAR-07<br>DSM-NAR-08<br>DSM-NAR-09 |
| Histrionic FP          | Psychological distress caused by a histrionic functioning pattern.   | present/absent | DSM-HST-01<br>DSM-HST-02<br>DSM-HST-03<br>DSM-HST-04<br>DSM-HST-05<br>DSM-HST-06<br>DSM-HST-07<br>DSM-HST-08               |

| Variable              | Description                                                                                                                           | States         | Ancestor nodes                                                                                                                             |
|-----------------------|---------------------------------------------------------------------------------------------------------------------------------------|----------------|--------------------------------------------------------------------------------------------------------------------------------------------|
| Passive-Aggressive FP | Psychological distress caused by a passive aggressive functioning pattern.                                                            | present/absent | DSM-PAG-01<br>DSM-PAG-02<br>DSM-PAG-03<br>DSM-PAG-04<br>DSM-PAG-05<br>DSM-PAG-06<br>DSM-PAG-07                                             |
| High Neuroticism      | Psychological distress caused by having a high neuroticism.                                                                           | present/absent | FFM-N1-Anxiety<br>FFM-N2-Angry hostility<br>FFM-N3-Depression<br>FFM-N4-Self-consciousness<br>FFM-N5-Impulsiveness<br>FFM-N6-Vulnerability |
| Low Extraversion      | Psychological distress caused by having a low extraversion.                                                                           | present/absent | FFM-E1-Warmth<br>FFM-E2-Gregariousness<br>FFM-E3-Assertiveness<br>FFM-E4-Activity<br>FFM-E5-Excitement seeking<br>FFM-E6-Positive emotions |
| Low Agreeableness     | Psychological distress caused by having a low agreeableness.                                                                          | present/absent | FFM-A1-Trust<br>FFM-A2-Straightforwardness<br>FFM-A3-Altruism<br>FFM-A4-Compliance<br>FFM-A5-Modesty<br>FFM-A6-Tender-mindedness           |
| Low Conscientiousness | Psychological distress caused by having a low conscientiousness.                                                                      | present/absent | FFM-C1-Competence<br>FFM-C2-Order<br>FFM-C3-Dutifulness<br>FFM-C5-Self-discipline<br>FFM-C6-Deliberation                                   |
| Maladaptive LPF       | Psychological distress caused by having a maladaptive level of personality functioning.                                               | present/absent | LPF-Identity<br>LPF-Self-Direction<br>LPF-Empathy<br>LPF-Intimacy                                                                          |
| LPF-Personal          | Psychological distress caused by having a maladaptive level of personality functioning taking only into account the personal aspects. | present/absent | LPF-Identity<br>LPF-Self-Direction                                                                                                         |

| Variable          | Description                                                                                                                                | States         | Ancestor nodes                                                                                                                                                                                  |
|-------------------|--------------------------------------------------------------------------------------------------------------------------------------------|----------------|-------------------------------------------------------------------------------------------------------------------------------------------------------------------------------------------------|
| LPF-Interpersonal | Psychological distress caused by having a maladaptive level of personality functioning taking only into account the interpersonal aspects. | present/absent | LPF-Empathy<br>LPF-Intimacy                                                                                                                                                                     |
| Defensive FP      | Psychological distress caused by having an excess of immature copying mechanism.                                                           | present/absent | DM-Acting Out<br>DM-Idealization<br>DM-Projective Identification<br>DM-Denial<br>DM-Dissociation<br>DM-Devaluation<br>DM-Projection<br>DM-Splitting<br>DM-Displacement<br>DM-Passive Aggression |
